# Supplementary material for: Exploring modular reengineering strategies to redesign the teicoplanin non-ribosomal peptide synthetase
Source: Royal Society of Chemistry journal article supplement (doi:10.1039/d0sc03483e), 2020-01-01
Supplement: d0sc03483e1.pdf [file d0sc03483e1.pdf]

| Sample                       | m/z (detected, peak apex) | RT (min, peak apex) | Peak height (apex scan, raw) | Putative composition (m-NHMe, c-OH) | Theoretical m/z  | Mass error (ppm) | MSMS isolation (m/z) | MSMS spectral RT | Putative C-terminal residue | Peptide species | Putative Sequence ID<br>Note, C=ClBht, X=CTyr, H=Hpg, D=Dpg, Y=Tyr | Sequence within NRPS Pathway - (red sequences excluded) | Proposed Module Pathway - (red sequences excluded) | Notes (main sequence ions detected with losses as # = -CO, * = -NH3, ^ = -CH5 (MA), * = -H2O)                                                          |
|------------------------------|---------------------------|---------------------|------------------------------|-------------------------------------|------------------|------------------|----------------------|------------------|-----------------------------|-----------------|--------------------------------------------------------------------|---------------------------------------------------------|----------------------------------------------------|--------------------------------------------------------------------------------------------------------------------------------------------------------|
|                              |                           |                     |                              |                                     |                  |                  |                      |                  |                             |                 |                                                                    | unusual communication; anticipated; N-term extension    | (Z) = unusual communication; anticipated           |                                                                                                                                                        |
| M5-6 + M7a                   | 559.15997                 | 23.19               | 2.16E+06                     | 1Hpg1Dpg1ClBht-m                    | 559.15901        | 1.72             | 559.158996           | 23.18            | D                           |                 | HCD                                                                |                                                         | 56-7                                               | v1, b2*, y2*, M^#*, M^#*, M^#*, M^#* - however noisy with many abundant unexplained ions                                                               |
|                              | 559.16022                 | 24.1                | 1.00E+06                     | 1Hpg1Dpg1ClBht-m                    | 559.15901        | 2.16             | 559.158996           | 24.09            | D                           |                 | HCD                                                                |                                                         | 56-7                                               | v1, b2*, y2*, M^#*, M^#*, M^#*, M^#* - however noisy with many abundant unexplained ions                                                               |
|                              | 559.15985                 | 25.54               | 1.68E+06                     | 1Hpg1Dpg1ClBht-m                    | 559.15901        | 1.50             | 559.158996           | 25.53            | D                           |                 | HCD                                                                |                                                         | 56-7                                               | v1, b2*, y2*, M^#*, M^#*, M^#*, M^#* - however noisy with many abundant unexplained ions                                                               |
|                              | 559.15973                 | 26.1                | 9.37E+05                     | 1Hpg1Dpg1ClBht-m                    | 559.15901        | 1.29             | 559.158996           | 26.09            | D                           |                 | HCD                                                                |                                                         | 56-7                                               | v1, b2*, y2*, M^#*, M^#*, M^#*, M^#* - however noisy with many abundant unexplained ions                                                               |
| M5-6a + M3                   | 559.15967                 | 24.01               | 1.28E+06                     | 1Hpg1Dpg1ClBht-m                    | 559.15901        | 1.18             | 559.158996           | 24.01            | D                           | 3a              | HCD?                                                               | HCD                                                     | 56a-3                                              | y1, b2*, y2*, M^#*, M^#*, M^#*, M^#* - however noisy with many abundant unexplained ions                                                               |
|                              | 559.15948                 | 24.7                | 1.29E+06                     | 1Hpg1Dpg1ClBht-m                    | 559.15901        | 0.84             | 559.158996           | 24.69            | D                           |                 | HCD?                                                               |                                                         | 56a-3                                              | y1, b2*, y2*, M^#*, M^#*, M^#*, M^#* - however noisy with many abundant unexplained ions                                                               |
| M5-6a + M3 + M4              | 708.20709                 | 21.76               | 3.04E+07                     | 2Hpg1Dpg1ClBht-m                    | 708.20669        | 0.56             | 708.206726           | 21.79            | H                           | 13a             | HCDH                                                               | H-C-D-H-H-C-D-H                                         | 56a-3-4-56a-3-4                                    | y1*, y1, y2, y2*, CDH**, CDH**, CDH*, CDH*                                                                                                             |
|                              | 708.20721                 | 22.51               | 1.97E+06                     | 2Hpg1Dpg1ClBht-m                    | 708.20669        | 0.73             | 708.206726           | 22.53            | H/C                         | 13a/15a         | HCDH/DHHC/CDH/HDC (combination spectrum)                           | H-C-D-H-H-C-D-H/H-C-D-H-H-C-D-H                         | 56a-3-4-56a-3-4/56a-3-4-56a-3-4                    | combination of neighbouring peak spectra                                                                                                               |
|                              | 708.20734                 | 22.78               | 4.77E+06                     | 2Hpg1Dpg1ClBht-m                    | 708.20669        | 0.92             | 708.206726           | 22.78            | C                           | 15a             | DHHC/HDC                                                           | H-C-D-H-H-C-D-H                                         | 56a-3-4-56a-3-4                                    | y1*, y2**, y2*, y2**, DH#, DH#*                                                                                                                        |
|                              | 708.20728                 | 22.91               | 1.04E+07                     | 2Hpg1Dpg1ClBht-m                    | 708.20669        | 0.83             | 708.207164           | 22.91            | H                           |                 | CDHH                                                               | H-C-D-H-H-C-D-H                                         | 56a-3-4-56a-3-4                                    | y1*, b2*, y2*, y2**#, a2*, y1, DH#, y2**, DH#, a3*, b3*, y3, a3**, a3#**, a3                                                                           |
|                              | 708.20764                 | 23.37               | 6.23E+06                     | 2Hpg1Dpg1ClBht-m                    | 708.20669        | 1.34             | 708.206726           | 23.37            | H                           | 18a             | CDHH                                                               | H-C-D-H-H-C-D-H                                         | 56a-3-4-56a-3-4                                    | y1*, y2*, b2*, y2**#, a2*, y1, DH#, y2**, DH#, a3#**, a3*, a3                                                                                          |
|                              | 873.24927                 | 22.76               | 5.40E+07                     | 2Hpg2Dpg1ClBht-m                    | 873.24928        | 0.01             | 873.249103           | 22.83            | D                           | 20a             | HCDHD                                                              | H-C-D-H-D-C-D-H                                         | 56a-3-4-(Z)-56a-3-4                                | y1, y2*, y1*, y2**#, y2**#, a3**, a3#**, b3**, b2**, y2**, a2**, a4**, a4*, y2, a3*, M^#**#, a2*, y4**#, a2*                                           |
|                              | 873.24951                 | 23.09               | 1.22E+08                     | 2Hpg2Dpg1ClBht-m                    | 873.24928        | 0.26             | NA                   | NA               | NA                          | NA              | NA                                                                 | NA                                                      | NA                                                 | peak without MSMS spectrum                                                                                                                             |
|                              | 873.24945                 | 23.2                | 2.22E+08                     | 2Hpg2Dpg1ClBht-m                    | 873.24928        | 0.19             | 873.249767           | 23.18            | D                           |                 | HCDHD                                                              | H-C-D-H-D-C-D-H                                         | 56a-3-4-(Z)-56a-3-4                                | y1, y1*, y2*, y2**#, y2**#, a3**, b2*, b3**, b2**, a3#**, y2**, a2**, b3*, a4**, a2**, y2, M^#**#, a2*, a4*, a2*, a2#**, a3*, y4**#, y3, b2, a2#**, a4 |
|                              | 873.24957                 | 23.44               | 1.38E+07                     | 2Hpg2Dpg1ClBht-m                    | 873.24928        | 0.33             | 873.24932            | 23.35            | D                           | 20a             | HCDHD                                                              | H-C-D-H-D-C-D-H                                         | 56a-3-4-(Z)-56a-3-4                                | highly similar to above                                                                                                                                |
|                              | 873.24963                 | 23.55               | 8.53E+06                     | 2Hpg2Dpg1ClBht-m                    | 873.24928        | 0.40             | 873.24995            | 23.53            | H                           |                 | HCDHD??                                                            |                                                         |                                                    | similar fragment masses but different abundances                                                                                                       |
|                              | 1070.27502                | 26.89               | 5.74E+06                     | 3Hpg1Dpg2ClBht-m                    | 1070.27364       | 1.29             | NA                   | NA               | NA                          | NA              | NA                                                                 | NA                                                      | NA                                                 | peak without MSMS spectrum                                                                                                                             |
|                              | 1070.27502                | 27.06               | 1.93E+07                     | 3Hpg1Dpg2ClBht-m                    | 1070.27364       | 1.29             | NA                   | NA               | NA                          | NA              | NA                                                                 | NA                                                      | NA                                                 | peak without MSMS spectrum                                                                                                                             |
|                              | 1070.27490                | 27.28               | 3.42E+07                     | 3Hpg1Dpg2ClBht-m                    | 1070.27364       | 1.18             | 1070.27563           | 27.26            | C                           | 19a             | ??HHC                                                              | H-C-D-H-H-C-D-H                                         | 56a-3-4-56a-3-4                                    | y1*, y1^0, HH#, CH*, DH#, CD*, DH#, HCD*, HH, y2, HCD*, CHC**#, HH#, y2*, y1, y1**                                                                     |
|                              | M5-6 + M3a + M4           | 708.20685           | 27.13                        | 1.67E+06                            | 2Hpg1Dpg1ClBht-m | 708.20669        | 0.23                 | 708.206726       | 27.13                       | H               | 13a                                                                | HCDH                                                    | H-C-D-H-H-C-D-H                                    | 56-3a-4-56-3a-4                                                                                                                                        |
| 708.20685                    |                           | 27.32               | 2.09E+06                     | 2Hpg1Dpg1ClBht-m                    | 708.20669        | 0.23             | 708.206726           | 27.35            | H                           |                 | HCDH                                                               | H-C-D-H-H-C-D-H                                         | 56-3a-4-56-3a-4                                    | y1*, y1, y2, y2*, CDH**, CDH**, CDH*, CDH*                                                                                                             |
| 708.20770                    |                           | 28.53               | 2.92E+06                     | 2Hpg1Dpg1ClBht-m                    | 708.20669        | 1.43             | 708.206726           | 28.44            | C                           | 15a             | DHHC/HDC                                                           | H-C-D-H-H-C-D-H                                         | 56-3a-4-56-3a-4                                    | y1*, y2**, y2*, y2*, y2**, DH#, DH                                                                                                                     |
| 708.20734                    |                           | 28.99               | 8.60E+06                     | 2Hpg1Dpg1ClBht-m                    | 708.20669        | 0.92             | 708.206726           | 28.99            | H                           |                 | HCDH                                                               | H-C-D-H-H-C-D-H                                         | 56-3a-4-56-3a-4                                    | y1*, y1, y2, y2*, CDH**, CDH**, CDH*, CDH*                                                                                                             |
| 708.20721                    |                           | 29.12               | 1.31E+07                     | 2Hpg1Dpg1ClBht-m                    | 708.20669        | 0.73             | 708.206726           | 29.12            | H                           | 13a             | HCDH                                                               | H-C-D-H-H-C-D-H                                         | 56-3a-4-56-3a-4                                    | y1*, y1, y2, y2*, CDH**, CDH**, CDH*, CDH*                                                                                                             |
| 708.20746                    |                           | 29.52               | 2.23E+06                     | 2Hpg1Dpg1ClBht-m                    | 708.20669        | 1.09             | 708.206726           | 29.52            | D                           | 7a              | HHC                                                                | H-C-D-H-H-C-D-H                                         | 56-3a-4-56-3a-4                                    | y2** y1, b3**, a3**, y1*, y2**#, y2*, y3**#, y3**#, M^#**                                                                                              |
| 857.25488                    |                           | 29.77               | 1.18E+08                     | 3Hpg1Dpg1ClBht-m                    | 857.25437        | 0.59             | 857.254846           | 29.83            | H                           | 14a             | ?HHC                                                               | H-C-D-H-H-C-D-H                                         | 56-3a-4-56-3a-4                                    | v1, y2 - but presence of HH#, HD, HC, HH, DC related ions                                                                                              |
| 857.25494                    |                           | 30.2                | 1.64E+08                     | 3Hpg1Dpg1ClBht-m                    | 857.25437        | 0.66             | 857.255645           | 30.39            | H                           |                 | ?HHC                                                               |                                                         |                                                    | v1, y2 - but presence of HH#, HD, HC, HH, DC related ions                                                                                              |
| 857.25507                    |                           | 30.51               | 1.01E+08                     | 3Hpg1Dpg1ClBht-m                    | 857.25437        | 0.82             | 857.255267           | 30.57            | D/C                         | 17a             | HHHC                                                               | H-C-H-H-H-C-D-H/H-C-H-H-H-C-D-H                         | 56-(Z)-56-3a-4/56-(Z)-4-56-3a-4                    | a3*, y1, y2**, b3*, y2**#, y2* - but also presence of HD related ions                                                                                  |
| 857.25500                    |                           | 30.88               | 1.22E+08                     | 3Hpg1Dpg1ClBht-m                    | 857.25437        | 0.73             | 857.255318           | 30.95            | D/C                         |                 | HHHC                                                               |                                                         |                                                    | a3*, y1, y2**, b3*, y2**#, y2* - but also presence of HD related ions                                                                                  |
| 857.25507                    |                           | 31.31               | 1.43E+08                     | 3Hpg1Dpg1ClBht-m                    | 857.25437        | 0.82             | NA                   | NA               | NA                          | NA              | NA                                                                 | NA                                                      | NA                                                 | peak without MSMS spectrum                                                                                                                             |
| 857.25543                    |                           | 31.56               | 7.80E+07                     | 3Hpg1Dpg1ClBht-m                    | 857.25437        | 1.24             | 857.255448           | 31.50            | H                           | 14a             | ?HHC                                                               | H-C-D-H-H-C-D-H                                         | 56-3a-4-56-3a-4                                    | y1, y2 - but presence of HH#, HD, HC, HH, DC related ions                                                                                              |
| 873.24957                    |                           | 29.83               | 3.00E+07                     | 2Hpg2Dpg1ClBht-m                    | 873.24928        | 0.33             | 873.249182           | 29.77            | D                           | 16a             | DHHC                                                               | H-C-D-H-H-C-D-H                                         | 56-3a-4-56-3a-4                                    | a2, b2, y1, y2**, y2*, HHC**, y3**#, y3**#, y3**#, y3**                                                                                                |
| 873.24921                    |                           | 30.17               | 3.10E+07                     | 2Hpg2Dpg1ClBht-m                    | 873.24928        | 0.08             | 873.249218           | 30.14            | D                           |                 | DHHC                                                               |                                                         |                                                    | a2, b2, y1, y2**, y2*, HHC**, y3**#, y3**#, y3**#, y3**                                                                                                |
| M6a + M3 + M4 + M5 + M6 + M7 | 527.17047                 | 26.62               | 2.63E+05                     | 2Hpg1CTYr-m                         | 527.16919        | 2.43             | 527.169799           | 26.60            | H                           |                 | XHH                                                                |                                                         |                                                    | y1*, a2, y2**#, y2*, y1                                                                                                                                |
|                              | 527.16937                 | 27.19               | 3.07E+05                     | 2Hpg1CTYr-m                         | 527.16919        | 0.34             | 527.169433           | 27.17            | H                           |                 | XHH                                                                |                                                         |                                                    | y1*, a2, y2**#, y2*, y1                                                                                                                                |
|                              | 527.16974                 | 27.58               | 8.05E+04                     | 2Hpg1CTYr-m                         | 527.16919        | 1.04             | 527.169305           | 27.60            | H                           |                 | XHH                                                                |                                                         |                                                    | y1*, a2, y2**#, y2*, y1                                                                                                                                |
|                              | 530.13354                 | 27.7                | 2.41E+05                     | 1Hpg1Dpg1CTYr-c                     | 530.13247        | 2.02             | 530.132507           | 27.69            | D                           | 24b             | HXD                                                                | X-D-H-H-X-D                                             | 6a-3-4-5-6-7                                       | y1 - noisy, as coeluting with 529.757 2+ ion                                                                                                           |
|                              | 530.13330                 | 29.77               | 3.77E+06                     | 1Hpg1Dpg1CTYr-c                     | 530.13247        | 1.57             | 530.132507           | 29.77            | D                           |                 | XHD?                                                               |                                                         |                                                    | y1, b2*, a2*, b2, y2*(very low)                                                                                                                        |
|                              | 692.21259                 | 27.41               | 1.49E+06                     | 2Hpg1Dpg1CTYr-m                     | 692.21178        | 1.17             | 692.211791           | 27.42            | H                           |                 | XDHH                                                               |                                                         |                                                    | y1*, y2*, y1, HH#, a2, b2, y2, a3, b3                                                                                                                  |
|                              | 692.21283                 | 27.58               | 7.37E+05                     | 2Hpg1Dpg1CTYr-m                     | 692.21178        | 1.52             | 692.211791           | 27.57            | H                           |                 | XDHH                                                               | X-D-H-H-X-D                                             | 6a-3-4-5-6-7                                       | y1*, y2*, y1, HH#, a2, b2, y2, a3, b3                                                                                                                  |
|                              | 692.21448                 | 28.05               | 3.68E+06                     | 2Hpg1Dpg1CTYr-m                     | 692.21178        | 3.90             | 692.211791           | 28.03            | H                           |                 | XDHH                                                               |                                                         |                                                    | y1*, y2*, y1, HH#, a2, b2, y2, a3, b3                                                                                                                  |
|                              | 692.21344                 | 28.59               | 2.16E+06                     | 2Hpg1Dpg1CTYr-m                     | 692.21178        | 2.40             | 692.211791           | 28.57            | H                           |                 | XDHH                                                               |                                                         |                                                    | y1*, y2*, y1, HH#, a2, b2, y2, a3, b3                                                                                                                  |
|                              | 841.26202                 | 30.49               | 1.92E+06                     | 3Hpg1Dpg1CTYr-m                     | 841.25946        | 3.04             | 841.26062            | 30.41            | H                           | 23a             | XDHHH                                                              | X-D-H-H-H-D                                             | 6a-3-4-5-(Z)-7, Z=5 in this case                   | a3*, a3#*, y1*, b3*, DH#, y2**#, a2#*, y2*, a4*, DH#, y2, y3**#                                                                                        |
|                              | 841.26154                 | 30.83               | 7.24E+05                     | 3Hpg1Dpg1CTYr-m                     | 841.261474       | 2.47             | 841.261474           | 30.81            | H                           |                 | XDHHH                                                              |                                                         |                                                    | a3*, a3#*, y1*, b3*, DH#, y2**#, a2#*, y2*, a4*, DH#, y2, y3**#, b3                                                                                    |
|                              | 844.22510                 | 33.99               | 4.55E+05                     | 2Hpg2Dpg1CTYr-c                     | 844.22274        | 2.80             | 844.224792           | 33.95            | ?                           | 25a             | Uncertain (weak)                                                   | X-D-H-H-X-D                                             | 6a-3-4-5-6-7                                       | DH#, XHH#, XDHH#, XDH#, HH#, CH#, CH*                                                                                                                  |
|                              | 1041.24878                | 37.8                | 4.38E+04                     | 2Hpg2Dpg2CTYr-c                     | 1041.2471        | 1.61             | 1041.24707           | 37.80            | ?                           |                 | Uncertain (weak, coeluting 6+ species)                             | X-D-H-H-X-D                                             |                                                    | HH#*                                                                                                                                                   |
|                              | 1041.24890                | 38.39               | 5.48E+04                     | 2Hpg2Dpg2CTYr-c                     | 1041.2471        | 1.73             | 1041.24707           | 38.42            | ?                           | 26b             | Uncertain (weak)                                                   | X-D-H-H-X-D                                             | 6a-3-4-5-6-7                                       | DH#*, DX#                                                                                                                                              |
| M3 + M5                      | 509.20352                 | 24.79               | 4.21E+06                     | 1Hpg1Dpg1TYr-m                      | 509.20307        | 0.88             | 509.203094           | 24.79            | D                           | 10a             | HYD                                                                | (HYD)                                                   | (HYD)-3 (synthetic tripeptide)                     | y1, y2, b2*, y1*, M^#*, M^#*, M^#**                                                                                                                    |
|                              | 509.20364                 | 25                  | 4.88E+06                     | 1Hpg1Dpg1TYr-m                      | 509.20307        | 1.12             | 509.203094           | 25.00            | D                           |                 | HYD                                                                |                                                         | (HYD)-3 (synthetic tripeptide)                     | y1, y2, b2*, y1*, M^#*, M^#*, M^#**                                                                                                                    |
|                              | 509.20380                 | 27.05               | 3.92E+05                     | 1Hpg1Dpg1TYr-m                      | 509.20307        | 1.43             | 509.203094           | 26.98            | D                           |                 | HYD?                                                               |                                                         | (HYD)-3 (synthetic tripeptide)                     | y1, b2*, y1*, M^#*, M^#*, M^#**                                                                                                                        |
|                              | 658.25134                 | 28.23               | 2.83E+07                     | 2Hpg1Dpg1TYr-m                      | 658.25075        | 0.90             | 658.250732           | 28.23            | D                           | 28a             | HHYD                                                               | H-(HYD)                                                 | 5-(HYD)-3                                          | a3*, b3*, y1, y2, b2, b3, y3*, M^#*                                                                                                                    |
|                              | 658.25128                 | 28.33               | 1.90E+08                     | 2Hpg1Dpg1TYr-m                      | 658.25075        | 0.81             | 658.250732           | 28.35            | D                           |                 | HHYD                                                               |                                                         | 5-(HYD)-3                                          | a3*, b3*, y1, y2, b2, b3, y3*, M^#*                                                                                                                    |
|                              | 658.25122                 | 28.49               | 2.63E+08                     | 2Hpg1Dpg1TYr-m                      | 658.25075        | 0.71             | 658.250732           | 28.49            | D                           |                 | HHYD                                                               |                                                         | 5-(HYD)-3                                          | a3*, b3*, y1, y2, b2, b3, y3*, M^#*                                                                                                                    |
|                              | 807.29907                 | 30.23               | 4.40E+07                     | 3Hpg1Dpg1TYr-m                      | 807.29843        | 0.79             | 807.298539           | 30.32            | D                           |                 | HHHYD                                                              | H+-(HYD)                                                | 5-5-(HYD)-3                                        | a3*, b3*, y1, b2, b2*, y2, y2^, a4*                                                                                                                    |
|                              | 807.29919                 | 30.42               | 4.22E+07                     | 3Hpg1Dpg1TYr-m                      | 807.29843        | 0.94             | 807.299178           | 30.51            | D                           | 29a             | HHHYD                                                              | H+-(HYD)                                                | 5-5-(HYD)-3                                        | a3*, b3*, y1, b2, b2*, y2, y2^, a4*                                                                                                                    |
| 807.29895                    | 31.09                     | 2.38E+06            | 3Hpg1Dpg1TYr-m               | 807.29843                           | 0.64             | 807.298553       | 31.07                | D                |                             | HHHYD           |                                                                    | 5-5-(HYD)-3                                             | a3*, b3*, y1, b2, b2*, y2, y2^, a4*                |                                                                                                                                                        |
| M3 + M5c                     | 658.25134                 | 27.69               | 8.50E+08                     | 2Hpg1Dpg1TYr-m                      | 658.25075        | 0.90             | 658.250732           | 27.70            | H                           | 11a             | HYDH                                                               | (HYD)-H                                                 | (HYD)-3-4a                                         | a3*, b3*, a3#*, y1*, y2**#, y2, y1, b3, y3, M^#*                                                                                                       |
|                              | 807.29877                 | 30.11               | 3.37E+08                     | 3Hpg1Dpg1TYr-m                      | 807.29843        | 0.42             | 807.299177           | 30.07            | H                           | 12a             | ?[D]HH, most probably HYDHH                                        | (HYD)-H-H                                               | (HYD)-3-4a-4a                                      | a3*, a3#*, b3*, y1*, y2*, y1, y2, b3, a4*                                                                                                              |
|                              | 807.29913                 | 30.24               | 2.89E+08                     | 3Hpg1Dpg1TYr-m                      | 807.29843        | 0.87             | 807.299114           | 30.26            | H                           |                 | ?[D]HH, most probably HYDHH                                        |                                                         | (HYD)-3-4a-4a                                      | a3*, a3#*, b3*, y1*, y2*, y1, y2, b3, a4*                                                                                                              |
|                              | 807.29938                 | 31.03               | 4.63E+08                     | 3Hpg1Dpg1TYr-m                      | 807.29843        | 1.18             | 807.299481           | 31.01            | H                           | 27a             | HHYDH                                                              | H-(HYD)-H                                               | 4-(HYD)-3-4a                                       | a3*, y1*, b3*, y2**#, y1, a2*, y2**#, y2^, y2, b3, a4*                                                                                                 |
| M3 + M5c + M6                | 658.25116                 | 27.72               | 1.80E+08                     | 2Hpg1Dpg1TYr-m                      | 658.25075        | 0.62             | 658.250732           | 27.73            | H                           | 11a             | HYDH                                                               | (HYD)-H                                                 | (HYD)-3-4a                                         | a3*, b3*, a3#*, y2, y2**#, y1, y2^, y2**#, b3, y3, M^#*                                                                                                |
|                              | 858.23938                 | 32.87               | 6.60E+08                     | 2Hpg1Dpg1TYr1ClBht-c                | 858.23839        | 1.15             | 858.238403           | 32.89            | C                           | 21b             | HYDHC (OH)                                                         | (HYD)-H-C                                               | (HYD)-3-4a-6                                       | a3*, a3*, a3#*, y1*, DH#, DH#, DH, b2*, y2**, b3,                                                                                                      |
